# Supplementary material
Source: MDPI journal article supplement (https://www.mdpi.com/2673-7264/2/3/18)
Supplement: s1 [file s1]

*Thermo, 2022*

*Electronic Supporting Materials*

## Non-covalent interactions in triglycerides: vaporisation thermodynamics for quantification of dispersion forces

Sergey P. Verevkin<sup>a,b,\*</sup> and Ruslan N. Nagrimanov<sup>b</sup>

<sup>a</sup> *Department of Physical Chemistry, University of Rostock, and Competence Centre CALOR of Faculty of Interdisciplinary Research at University of Rostock, 18059 Rostock, Germany*

<sup>b</sup> *Department of Physical Chemistry, Kazan Federal University, 420008 Kazan, Russia*

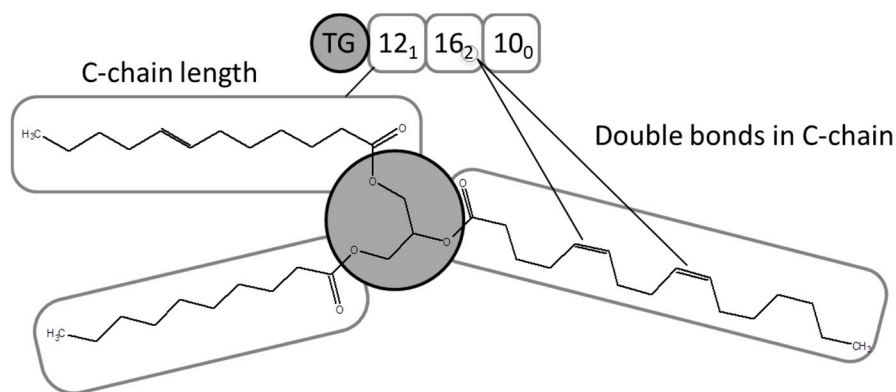

Figure S1. Schematic explanation of the TG abbreviations [1].

The TG molecule depicted in Fig. 1 contains three hydrocarbon side chains with 10, 12, and 16 carbon atoms. The subscripts represent the number of double bonds in a side chain. The C<sub>12</sub> side chain in Fig. S1 has one double bond and is thus named 12<sub>1</sub>, the C<sub>16</sub> chain has two double bonds and is thus named 16<sub>2</sub>, and the C<sub>10</sub> chain is completely saturated (10<sub>0</sub>).

*Nomenclature of triglycerides discussed in this paper:*

TG 2<sub>0</sub>2<sub>0</sub>2<sub>0</sub> (triacetin, glycerol triacetate)  
 TG 3<sub>0</sub>3<sub>0</sub>3<sub>0</sub> (tripropionin, glycerol tripropionate)  
 TG 4<sub>0</sub>4<sub>0</sub>4<sub>0</sub> (tributylin, glycerol tributanoate)  
 TG 5<sub>0</sub>5<sub>0</sub>5<sub>0</sub> (tripentanoin, glycerol tripentanoate)  
 TG 6<sub>0</sub>6<sub>0</sub>6<sub>0</sub> (tricapronin, glycerol trihexanoate)  
 TG 7<sub>0</sub>7<sub>0</sub>7<sub>0</sub> (triheptanoin, glycerol triheptanoate)  
 TG 8<sub>0</sub>8<sub>0</sub>8<sub>0</sub> (tricaprylin, glycerol trioctanoate)  
 TG 10<sub>0</sub>10<sub>0</sub>10<sub>0</sub> (tridecanoin, glycerol tridecanoate)  
 TG 12<sub>0</sub>12<sub>0</sub>12<sub>0</sub> (trilaurin, glyceryl tridodecanoate)  
 TG 14<sub>0</sub>14<sub>0</sub>14<sub>0</sub> (trimyristin, glycerol triteradecanoate)  
 TG 16<sub>0</sub>16<sub>0</sub>16<sub>0</sub> (tripalmitin, glycerol trihexadecanoate)  
 TG 18<sub>0</sub>18<sub>0</sub>18<sub>0</sub> (tristearin, glycerol trioctadecanoate)

*Vapour pressure measurements. Transpiration method*

Absolute vapour pressures of triglycerides were measured using the transpiration method [2; 3]. The main idea of this method is to saturate the gas stream flowing over the sample and to determine the amount of compound transferred by the gas within a given time. Approximately 0.3 to 0.5 g of the sample is mixed with glass beads (diameter 1 mm) and placed in the thermostatted U-shaped saturator. The glass beads are needed to enlarge the contact area between gas and sample. A stream of nitrogen at a well-defined flow rate was passed through the saturator at constant temperature ( $\pm 0.1$  K), and the transported material was collected in a cold trap. The amount of the condensed substance was determined by weighing with balances ( $\pm 0.0002$  g). The saturation vapour pressure  $p_i$  at each temperature  $T_i$  was calculated from the amount of condensate collected within a definite period of time:

$$p_i = m_i \cdot R \cdot T_a / V \cdot M_i ; \quad V = (n_{N_2} + n_i) \cdot R \cdot T_a / P_a \quad (S1)$$

where  $V$  is the volume of the gas phase consisting of the  $n_{N_2}$  moles of the carrier gas and  $n_i$  mole of gaseous compound under study (with the molar mass  $M_i$ ) at the atmospheric pressure  $P_a$  and the ambient temperature  $T_a$ . The volume of the carrier gas  $V_{N_2}$  was determined by the digital flow rate sensor from integration with a microcontroller. We used the Honeywell S&C - HAFBLF0200C2AX5 digital flow rate sensor with uncertainty at the level of 2.5 %. The flow rate of the nitrogen stream was also controlled by using a soap bubble flow meter (HP soap film flowmeter (model 0101-0113)) and optimized in order to reach the saturation equilibrium of the transporting gas at each temperature under study. The volume of the carrier gas  $V_{N_2}$  was readied from the digital flow rate sensor. The amount of the compound under investigation  $n_i$  in the carrier gas was estimated at each temperature using the ideal gas law.

Before starting the vapour pressure measurements, the sample was first pre-conditioned at 310-320 K (within about one hour) in order to remove possible traces of water. The saturator was then kept at 310-320 K (to remove possible traces of volatile compounds). In order to assure the competition of pre-conditioning at the selected temperature, three samples were taken during the sample flashing and weighted. A constant vapour pressure at this temperature indicated that the transpiration experiments could begin.

### *Thermodynamics of vaporisation*

The experimental vapour pressures  $p_i$  at different temperatures were fitted with the following equation [2; 3]:

$$R \times \ln(p_i / p_{ref}) = a + \frac{b}{T} + \Delta_1^g C_{p,m}^o \times \ln\left(\frac{T}{T_0}\right) \quad (S2),$$

where  $\Delta_1^g C_{p,m}^o$  is the difference of the molar heat capacities of the gas and the liquid phases respectively (see Table 3),  $a$  and  $b$  are adjustable parameters,  $R = 8.31446 \text{ J}\cdot\text{K}^{-1}\cdot\text{mol}^{-1}$  is the molar gas constant, and the reference pressure  $p_{ref} = 1 \text{ Pa}$ . The temperature  $T_0$  appearing in Eq. (S2) is generally an arbitrarily chosen reference temperature. In this work it was chosen to be  $T_0 = 298.15 \text{ K}$ . Experimental vapour pressures measured in this work (as well as those from the literature) have been used to obtain the enthalpies of vaporisation using the following equation:

$$\Delta_1^g H_m^o(T) = -b + \Delta_1^g C_{p,m}^o \times T \quad (S3)$$

Experimental vapour pressures temperature dependences were also used to derive the vaporisation entropies at temperatures  $T$  by using the following equation:

$$\Delta_1^g S_m^o(T) = \Delta_1^g H_m^o(T) / T + R \times \ln(p_i / p^o) \quad (S4)$$

with  $p^o = 0.1 \text{ MPa}$ . Coefficients  $a$  and  $b$  of Eq. (1),  $\Delta_1^g H_m^o(T)$  and  $\Delta_1^g S_m^o(T)$  values are collected in Table S1. The combined uncertainties of the vaporisation enthalpies include uncertainties from the experimental conditions of transpiration. uncertainties in vapour pressure and uncertainties due to the temperature adjustment to  $T = 298.15 \text{ K}$  as described elsewhere [4; 5]. The compilation of the standard molar enthalpies of vaporisation at the reference temperature  $T = 298.15 \text{ K}$ , calculated according to Eq. (S3) is given in Table 1 (main text).

**Table S1**

Results of transpiration method for triglycerides measured in this work: absolute vapour pressures  $p$ , standard molar vaporisation enthalpies and standard molar vaporisation entropies

| $T/$<br>K <sup>a</sup>                                                                                                  | $m/$<br>mg <sup>b</sup> | $V(\text{N}_2)^c/$<br>dm <sup>3</sup> | $T_a/$<br>K <sup>d</sup> | Flow/<br>dm <sup>3</sup> ·h <sup>-1</sup> | $p/$<br>Pa <sup>e</sup> | $u(p)/$<br>Pa <sup>f</sup> | $\Delta_1^g H_m^o(T)/$<br>kJ·mol <sup>-1</sup> | $\Delta_1^g S_m^o(T)/$<br>J·K <sup>-1</sup> ·mol <sup>-1</sup> |
|-------------------------------------------------------------------------------------------------------------------------|-------------------------|---------------------------------------|--------------------------|-------------------------------------------|-------------------------|----------------------------|------------------------------------------------|----------------------------------------------------------------|
| TG202020: $\Delta_1^g H_m^o(298.15 \text{ K}) = (80.2 \pm 0.9) \text{ kJ} \cdot \text{mol}^{-1}$                        |                         |                                       |                          |                                           |                         |                            |                                                |                                                                |
| $\ln(p_i/p_{ref}) = \frac{346.3}{R} - \frac{106392.2}{RT} - \frac{88}{R} \ln \frac{T}{298.15}; p_{ref} = 1 \text{ Pa}$  |                         |                                       |                          |                                           |                         |                            |                                                |                                                                |
| 318.1                                                                                                                   | 18.3                    | 99.51                                 | 289.0                    | 5.94                                      | 2.13                    | 0.06                       | 78.4                                           | 157.1                                                          |
| 327.5                                                                                                                   | 11.3                    | 26.78                                 | 294.8                    | 6.35                                      | 4.84                    | 0.13                       | 77.6                                           | 154.3                                                          |
| 335.9                                                                                                                   | 13.4                    | 15.87                                 | 294.8                    | 6.35                                      | 9.58                    | 0.26                       | 76.8                                           | 151.9                                                          |
| 341.4                                                                                                                   | 19.9                    | 14.60                                 | 289.0                    | 6.35                                      | 15.10                   | 0.40                       | 76.4                                           | 150.5                                                          |
| 347.9                                                                                                                   | 11.0                    | 5.032                                 | 294.4                    | 5.81                                      | 24.62                   | 0.64                       | 75.8                                           | 148.8                                                          |
| 354.9                                                                                                                   | 43.6                    | 11.67                                 | 294.4                    | 4.07                                      | 41.98                   | 1.07                       | 75.2                                           | 147.2                                                          |
| 360.9                                                                                                                   | 13.5                    | 2.322                                 | 294.8                    | 5.81                                      | 65.35                   | 1.66                       | 74.6                                           | 145.9                                                          |
| 362.9                                                                                                                   | 17.5                    | 2.613                                 | 296.6                    | 5.81                                      | 75.74                   | 1.92                       | 74.5                                           | 145.5                                                          |
| TG808080: $\Delta_1^g H_m^o(298.15 \text{ K}) = (131.9 \pm 1.4) \text{ kJ} \cdot \text{mol}^{-1}$                       |                         |                                       |                          |                                           |                         |                            |                                                |                                                                |
| $\ln(p_i/p_{ref}) = \frac{500.5}{R} - \frac{185270.7}{RT} - \frac{179}{R} \ln \frac{T}{298.15}; p_{ref} = 1 \text{ Pa}$ |                         |                                       |                          |                                           |                         |                            |                                                |                                                                |
| 403.2                                                                                                                   | 15.2                    | 383.9                                 | 295.9                    | 4.22                                      | 0.21                    | 0.01                       | 113.1                                          | 171.7                                                          |
| 408.2                                                                                                                   | 9.7                     | 161.8                                 | 295.9                    | 4.20                                      | 0.31                    | 0.01                       | 112.2                                          | 169.6                                                          |
| 413.2                                                                                                                   | 12.1                    | 134.6                                 | 295.9                    | 4.20                                      | 0.47                    | 0.02                       | 111.3                                          | 167.4                                                          |
| 423.2                                                                                                                   | 19.4                    | 100.8                                 | 295.9                    | 3.15                                      | 1.01                    | 0.03                       | 109.5                                          | 163.2                                                          |
| 433.2                                                                                                                   | 29.3                    | 77.45                                 | 295.9                    | 4.22                                      | 1.98                    | 0.05                       | 107.7                                          | 158.7                                                          |
| 443.2                                                                                                                   | 10.0                    | 13.01                                 | 295.9                    | 3.34                                      | 4.02                    | 0.11                       | 105.9                                          | 154.9                                                          |
| 448.2                                                                                                                   | 28.6                    | 27.22                                 | 295.9                    | 4.22                                      | 5.49                    | 0.16                       | 105.1                                          | 152.8                                                          |
| TG100100100: $\Delta_1^g H_m^o(298.15 \text{ K}) = (159.0 \pm 1.0) \text{ kJ} \cdot \text{mol}^{-1}$                    |                         |                                       |                          |                                           |                         |                            |                                                |                                                                |
| $\ln(p_i/p_{ref}) = \frac{573.1}{R} - \frac{220165.0}{RT} - \frac{205}{R} \ln \frac{T}{298.15}; p_{ref} = 1 \text{ Pa}$ |                         |                                       |                          |                                           |                         |                            |                                                |                                                                |
| 418.2                                                                                                                   | 5.6                     | 380.0                                 | 295.9                    | 4.69                                      | 0.065                   | 0.007                      | 134.4                                          | 203.1                                                          |
| 433.2                                                                                                                   | 9.6                     | 179.3                                 | 295.9                    | 4.81                                      | 0.237                   | 0.011                      | 131.4                                          | 195.6                                                          |
| 448.2                                                                                                                   | 18.0                    | 95.59                                 | 295.9                    | 4.20                                      | 0.835                   | 0.026                      | 128.3                                          | 189.1                                                          |
| 458.2                                                                                                                   | 24.2                    | 62.93                                 | 295.9                    | 4.18                                      | 1.705                   | 0.048                      | 126.2                                          | 184.3                                                          |
| 463.2                                                                                                                   | 36.0                    | 64.39                                 | 295.9                    | 4.16                                      | 2.479                   | 0.067                      | 125.2                                          | 182.2                                                          |
| 468.2                                                                                                                   | 32.0                    | 41.48                                 | 295.9                    | 4.13                                      | 3.420                   | 0.091                      | 124.2                                          | 179.8                                                          |

<sup>a</sup> Saturation temperature measured with the standard uncertainty ( $u(T) = 0.1 \text{ K}$ ).

<sup>b</sup> Mass of transferred sample condensed at  $T = 293 \text{ K}$ .

<sup>c</sup> Volume of nitrogen ( $u(V) = 0.005 \text{ dm}^3$ ) used to transfer  $m$  ( $u(m) = 0.0002 \text{ g}$ ) of the sample. Uncertainties are given as standard uncertainties.

<sup>d</sup>  $T_a$  is the temperature of the soap bubble meter used for measurement of the gas flow.

<sup>e</sup> Vapour pressure at temperature  $T$ , calculated from the  $m$  and the residual vapour pressure at the condensation temperature calculated by an iteration procedure.

<sup>f</sup> Standard uncertainties were calculated with  $u(p_i/\text{Pa}) = 0.005 + 0.025(p_i/\text{Pa})$  for pressures below 5 Pa and with  $u(p_i/\text{Pa}) = 0.025 + 0.025(p_i/\text{Pa})$  for pressures from 5 to 3000 Pa. The standard uncertainties for  $T$ ,  $V$ ,  $p$ ,  $m$ , are standard uncertainties with 0.683 confidence level. Uncertainties of the vaporisation enthalpy are expressed as the expanded uncertainty (0.95 level of confidence,  $k = 2$ ) calculated according to procedure described elsewhere [4; 5]. Uncertainties include uncertainties from the experimental conditions and the fitting equation, vapour pressures, and uncertainties from adjustment of vaporisation enthalpies to the reference temperature  $T = 298.15 \text{ K}$ .

## Quartz Crystal Microbalance (QCM)

Vapour pressures and molar enthalpies of vaporisation of TG10<sub>0</sub>10<sub>0</sub>10<sub>0</sub> and TG16<sub>0</sub>16<sub>0</sub>16<sub>0</sub>, were measured by using the QCM method [6]. A sample of an IL was placed in an open cavity (Langmuir evaporation) inside of the thermostat block and it was exposed to vacuum (10<sup>-5</sup> Pa) with the whole open surface of the loaded compound (see Fig. S2). The QCM-sensor was mounted directly above the measuring cavity containing the sample. Along the vaporisation into high vacuum, a certain amount of sample was condensed on the quartz crystal surface.

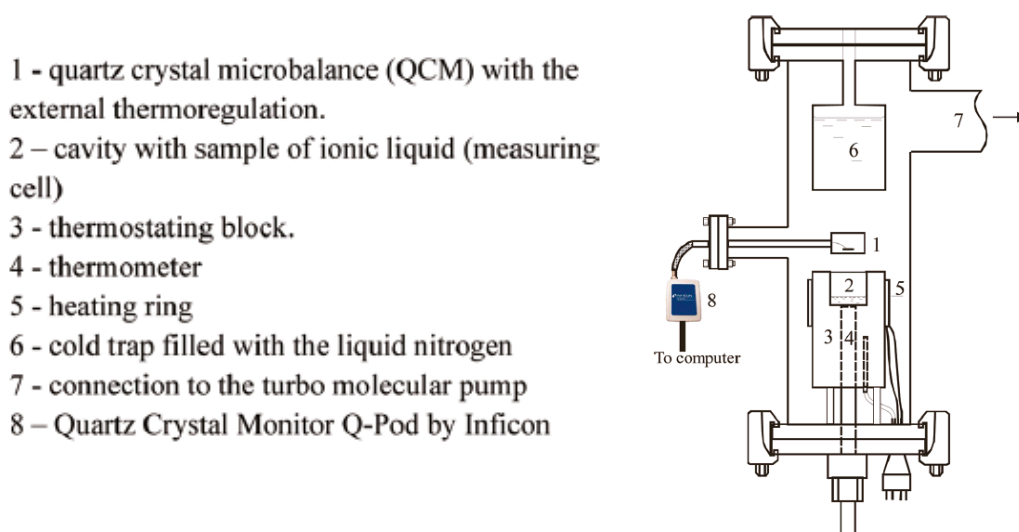

**Figure S2.** The scheme of the QCM experimental setup from [6].

The change in the vibrational frequency  $\Delta f$  was recorded. It is directly related to the mass deposition  $\Delta m$  on the QCM according to the Sauerbrey equation [7]:

$$\Delta f = -C \times f^2 \times \Delta m \times S_c^{-1} \quad (S5)$$

where  $f$  is the fundamental frequency of the crystal (6 MHz in this case) with  $\Delta f \ll f$ ,  $S_c$  is the surface of the crystal, and  $C$  is a constant. The measured frequency change rates ( $df/dr$ ) can be used for calculation of absolute vapour pressures  $p_i$  according to equation:

$$p_i = K' \frac{df}{dt} \sqrt{\frac{T}{M}} \quad (S6)$$

where the  $K' = (9.5 \pm 1.1) \cdot 10^{-6} \text{ Pa} \cdot \text{s} \cdot \text{kg}^{1/2} \cdot \text{Hz}^{-1} \cdot \text{K}^{-1/2} \cdot \text{mol}^{-1/2}$  [8] is the empirical calibration constant including all parameters involved in Eq. (S5), as well as the all apparatus geometry specific parameters. Calibration of the set up was performed with the help of reliable vapour pressure data on very low volatile liquids [C<sub>n</sub>Py][NTf<sub>2</sub>], [C<sub>n</sub>C<sub>n</sub>im][NTf<sub>2</sub>], and [C<sub>n</sub>mim][NTf<sub>2</sub>]. The experimental vapour pressures  $p_i$  at different temperatures were fitted with Eq. (S2) and the vaporisation enthalpies were derived according to Eq. (S3). A typical experiment was performed in a few consequent series with increasing and decreasing temperature steps. Every series included from 5 to 9 temperature points of mass loss rate determination. Such a procedure allowed for detection of any possible decomposition during frequency loss rate ( $df/dr$ ) measurements. Reproducibility of results was established in series of randomly performed experimental runs. Uncertainties include uncertainties from the experimental conditions and the fitting equation, vapour pressures, and uncertainties from adjustment of

vaporisation enthalpies to the reference temperature  $T = 298.15$  K. Primary experimental results of the QCM studies are provided in Table S2.

**Table S2.**

The experimental mass loss rates and vapour pressures determined for TG100100100 [1] and TG160160160 with QCM technique

| Run                                                                                                                     | $T$ , K | $10^{10}dm / dt$ , kg s <sup>-1</sup> | $10^{-6} \times p_i$ , Pa |
|-------------------------------------------------------------------------------------------------------------------------|---------|---------------------------------------|---------------------------|
| TG100100100: $\Delta_l^g H_m^o(298.15 \text{ K}) = (166.7 \pm 2.6) \text{ kJ} \cdot \text{mol}^{-1}$                    |         |                                       |                           |
| $\ln(p_i/p_{ref}) = \frac{592.7}{R} - \frac{227849.3}{RT} - \frac{205}{R} \ln \frac{T}{298.15}; p_{ref} = 1 \text{ Pa}$ |         |                                       |                           |
| 1                                                                                                                       | 367.81  | 0.4859                                | 223                       |
|                                                                                                                         | 363.18  | 0.2605                                | 119                       |
|                                                                                                                         | 358.38  | 0.1323                                | 59.9                      |
|                                                                                                                         | 353.48  | 0.06525                               | 29.4                      |
|                                                                                                                         | 348.50  | 0.03108                               | 13.9                      |
|                                                                                                                         | 367.80  | 0.4948                                | 227                       |
| 2                                                                                                                       | 363.18  | 0.2637                                | 120                       |
|                                                                                                                         | 358.38  | 0.1322                                | 59.9                      |
|                                                                                                                         | 353.48  | 0.06443                               | 29.0                      |
|                                                                                                                         | 348.50  | 0.03049                               | 13.6                      |
|                                                                                                                         |         |                                       |                           |
| TG160160160: $\Delta_l^g H_m^o(298.15 \text{ K}) = (210.2 \pm 9.2) \text{ kJ} \cdot \text{mol}^{-1}$                    |         |                                       |                           |
| $\ln(p_i/p_{ref}) = \frac{808.7}{R} - \frac{320021.5}{RT} - \frac{369}{R} \ln \frac{T}{298.15}; p_{ref} = 1 \text{ Pa}$ |         |                                       |                           |
| 1                                                                                                                       | 433.19  | 1.537                                 | 339                       |
|                                                                                                                         | 427.40  | 0.8323                                | 182                       |
|                                                                                                                         | 422.40  | 0.4665                                | 102                       |
|                                                                                                                         | 417.39  | 0.2570                                | 56                        |
|                                                                                                                         | 412.39  | 0.1439                                | 31                        |
|                                                                                                                         | 407.38  | 0.08034                               | 17                        |
|                                                                                                                         | 402.38  | 0.04381                               | 10                        |
|                                                                                                                         | 397.36  | 0.02297                               | 5                         |
|                                                                                                                         | 392.36  | 0.01187                               | 2.8                       |
|                                                                                                                         | 425.39  | 0.6421                                | 104                       |
| 2                                                                                                                       | 419.89  | 0.3432                                | 55                        |
|                                                                                                                         | 414.90  | 0.1907                                | 31                        |
|                                                                                                                         | 409.89  | 0.1058                                | 17                        |
|                                                                                                                         | 404.90  | 0.05905                               | 9                         |
|                                                                                                                         | 399.88  | 0.03133                               | 5                         |
|                                                                                                                         | 394.88  | 0.01662                               | 2.8                       |
|                                                                                                                         | 389.89  | 0.008619                              | 1.5                       |
|                                                                                                                         | 384.87  | 0.004196                              | 0.81                      |

<sup>a</sup>Uncertainties are expressed as the expanded uncertainty (0.95 level of confidence,  $k = 2$ ).

### *Isothermal stepwise TGA method.*

We used a Perkin Elmer Pyris 6 TGA to determine  $\Delta_l^g H_m^o(298.15 \text{ K})$  from the temperature dependence of the mass loss rate measurements. About 50-70 mg of the sample was placed in a plain platinum crucible inside of the measuring head of the TGA. The sample was step-wise heated and a mass loss from the crucible was recorded at each isothermal step. Isothermal mass loss rate  $dm/dt$  was monitored in the temperature range 400-490 K at a nitrogen flow

rate of 140 ml·min<sup>-1</sup>. According to the results reported in our previous work [9], the optimal conditions for the reliable determination of vaporisation enthalpies of ILs were as follows:

- mass loss  $dm/dt$  at each temperature - 0.1-0.8 mg;
- duration of isothermal steps - at least 10 min;
- temperature range - at least 60 K;

Prior to the measurement of vaporisation enthalpy, a careful conditioning of the sample inside the TGA have been performed. A heating ramp of 10 K·min<sup>-1</sup> was used, followed by a 4 h static hold period at 383 K, allowing for the slow removal of volatile impurities and traces of water prior to a stepwise isothermal runs. The conditioning was repeated until a reproducible mass loss within two consequent runs was recorded. The detailed experimental procedure has been elaborated in our lab and it was reported elsewhere [9]. Experimental results of the isothermal TGA (ITGA) studies are collected in Table S3.

**Table S3**

The experimental mass loss rates and vapour pressure determined for TG808080 and TG100100100 with the I-TGA technique [9].

| Run                                                                                                                      | $T, K$ | $10^{12} dm / dt, kg s^{-1}$ | $p, Pa^a$ |
|--------------------------------------------------------------------------------------------------------------------------|--------|------------------------------|-----------|
| TG808080: $\Delta_f^g H_m^o(298.15 K) = (135.0 \pm 4.7) kJ \cdot mol^{-1}$                                               |        |                              |           |
| $\ln(p_i/p_{ref}) = \frac{507.9}{R} - \frac{188408.3}{RT} - \frac{179}{R} \ln \frac{T}{298.15}; p_{ref} = 1 \text{ bar}$ |        |                              |           |
| 1                                                                                                                        | 404.26 | 226.6                        | 0.226     |
|                                                                                                                          | 410.18 | 355.1                        | 0.360     |
|                                                                                                                          | 416.09 | 545.5                        | 0.560     |
|                                                                                                                          | 421.99 | 849.9                        | 0.885     |
|                                                                                                                          | 427.89 | 1292                         | 1.36      |
|                                                                                                                          | 433.80 | 1974                         | 2.11      |
|                                                                                                                          | 439.75 | 2990                         | 3.25      |
|                                                                                                                          | 445.71 | 4496                         | 4.95      |
|                                                                                                                          | 451.68 | 6758                         | 7.53      |
|                                                                                                                          | 398.37 | 145.9                        | 0.143     |
|                                                                                                                          | 404.24 | 195.6                        | 0.195     |
|                                                                                                                          | 410.16 | 374.0                        | 0.379     |
|                                                                                                                          | 416.06 | 568.2                        | 0.583     |
|                                                                                                                          | 421.96 | 851.9                        | 0.887     |
| 2                                                                                                                        | 427.85 | 1294                         | 1.37      |
|                                                                                                                          | 433.76 | 1948                         | 2.09      |
|                                                                                                                          | 439.70 | 2957                         | 3.21      |
|                                                                                                                          | 445.66 | 4499                         | 4.95      |
|                                                                                                                          | 451.64 | 6774                         | 7.55      |
|                                                                                                                          | 398.33 | 137.5                        | 0.135     |
|                                                                                                                          | 404.20 | 214.0                        | 0.213     |
|                                                                                                                          | 410.12 | 353.0                        | 0.357     |
|                                                                                                                          | 416.02 | 548.6                        | 0.563     |
|                                                                                                                          | 421.92 | 849.8                        | 0.885     |
| 3                                                                                                                        | 427.81 | 1312                         | 1.39      |
|                                                                                                                          | 433.73 | 1982                         | 2.12      |
|                                                                                                                          | 439.67 | 3010                         | 3.27      |
|                                                                                                                          | 445.64 | 4475                         | 4.92      |
|                                                                                                                          | 451.63 | 6753                         | 7.53      |
| 4                                                                                                                        | 398.33 | 161.5                        | 0.159     |

|   |        |       |       |
|---|--------|-------|-------|
|   | 404.18 | 222.4 | 0.222 |
|   | 410.09 | 391.0 | 0.396 |
|   | 415.99 | 536.7 | 0.551 |
|   | 421.89 | 774.0 | 0.806 |
|   | 427.78 | 1245  | 1.31  |
|   | 433.69 | 1888  | 2.02  |
|   | 439.63 | 2879  | 3.12  |
|   | 445.59 | 4351  | 4.79  |
|   | 451.58 | 6534  | 7.28  |
|   | 402.22 | 192.3 | 0.191 |
|   | 408.12 | 314.6 | 0.317 |
|   | 414.02 | 477.6 | 0.489 |
|   | 419.92 | 716.6 | 0.743 |
|   | 425.80 | 1105  | 1.16  |
| 5 | 431.72 | 1687  | 1.80  |
|   | 437.65 | 2558  | 2.77  |
|   | 443.60 | 3816  | 4.18  |
|   | 449.57 | 5684  | 6.31  |
|   | 455.57 | 8477  | 9.54  |
|   | 461.59 | 12415 | 14.2  |
|   | 408.09 | 279.9 | 0.282 |
|   | 413.99 | 471.1 | 0.482 |
|   | 419.89 | 749.1 | 0.777 |
|   | 425.78 | 1127  | 1.19  |
| 6 | 431.69 | 1694  | 1.81  |
|   | 437.62 | 2583  | 2.79  |
|   | 443.58 | 3848  | 4.22  |
|   | 449.56 | 5788  | 6.43  |
|   | 455.55 | 8609  | 9.69  |
|   | 461.57 | 12637 | 14.4  |
|   | 408.07 | 316.1 | 0.319 |
|   | 413.98 | 468.3 | 0.479 |
|   | 419.87 | 737.3 | 0.765 |
|   | 425.76 | 1090  | 1.15  |
| 7 | 431.67 | 1651  | 1.76  |
|   | 437.60 | 2543  | 2.75  |
|   | 443.56 | 3834  | 4.20  |
|   | 449.53 | 5762  | 6.40  |
|   | 455.52 | 8525  | 9.59  |
|   | 461.54 | 12365 | 14.1  |
|   | 402.15 | 189.0 | 0.188 |
|   | 408.06 | 326.9 | 0.330 |
|   | 413.96 | 474.9 | 0.486 |
|   | 419.86 | 726.7 | 0.754 |
|   | 425.74 | 1096  | 1.15  |
| 8 | 431.66 | 1675  | 1.79  |
|   | 437.59 | 2528  | 2.73  |
|   | 443.55 | 3773  | 4.13  |
|   | 449.51 | 5676  | 6.30  |
|   | 455.51 | 8377  | 9.43  |
|   | 461.53 | 12128 | 13.8  |



TG10o10o10o:  $\Delta_f^g H_m^o(298.15 \text{ K}) = (169.6 \pm 4.7) \text{ kJ} \cdot \text{mol}^{-1}$

$$\ln(p_i/p_{ref}) = \frac{599.5}{R} - \frac{230762.0}{RT} - \frac{205}{R} \ln \frac{T}{298.15}; p_{ref} = 1 \text{ bar}$$

|   |        |         |       |
|---|--------|---------|-------|
| 1 | 433.93 | 0.05252 | 0.344 |
|   | 439.83 | 0.08623 | 0.568 |
|   | 445.72 | 0.1388  | 0.921 |
|   | 451.66 | 0.2326  | 1.55  |
|   | 457.64 | 0.3665  | 2.46  |
|   | 463.65 | 0.5896  | 3.99  |
|   | 469.68 | 0.9219  | 6.28  |
|   | 475.74 | 1.417   | 9.72  |
|   | 481.73 | 2.155   | 14.9  |
|   | 439.76 | 0.08927 | 0.588 |
| 2 | 445.68 | 0.1481  | 0.983 |
|   | 451.63 | 0.2251  | 1.50  |
|   | 457.62 | 0.3744  | 2.52  |
|   | 463.63 | 0.6004  | 4.06  |
|   | 469.66 | 0.9341  | 6.36  |
|   | 475.71 | 1.443   | 9.89  |
|   | 481.70 | 2.185   | 15.1  |
|   | 427.94 | 0.03171 | 0.206 |
|   | 433.83 | 0.05153 | 0.337 |
|   | 439.73 | 0.08470 | 0.558 |
| 3 | 445.65 | 0.1426  | 0.946 |
|   | 451.61 | 0.2240  | 1.50  |
|   | 457.60 | 0.3730  | 2.51  |
|   | 463.60 | 0.5983  | 4.05  |
|   | 469.64 | 0.9251  | 6.30  |
|   | 475.69 | 1.430   | 9.80  |
|   | 481.67 | 2.1745  | 15.0  |
|   | 439.71 | 0.08145 | 0.537 |
|   | 445.63 | 0.1319  | 0.875 |
|   | 451.59 | 0.2214  | 1.48  |
| 4 | 457.58 | 0.3582  | 2.41  |
|   | 463.57 | 0.5761  | 3.90  |
|   | 469.61 | 0.8930  | 6.08  |
|   | 475.65 | 1.390   | 9.53  |
|   | 481.63 | 2.110   | 14.6  |
|   | 443.68 | 0.1198  | 0.793 |
|   | 449.60 | 0.1858  | 1.24  |
|   | 455.56 | 0.2947  | 1.98  |
|   | 461.55 | 0.4730  | 3.19  |
|   | 467.56 | 0.7422  | 5.04  |
| 5 | 473.61 | 1.152   | 7.88  |
|   | 479.64 | 1.768   | 12.2  |
|   | 485.59 | 2.632   | 18.2  |
|   | 491.56 | 3.886   | 27.1  |
|   | 449.57 | 0.1869  | 1.25  |
| 6 | 455.54 | 0.3048  | 2.04  |
|   | 461.53 | 0.4941  | 3.34  |
|   | 467.55 | 0.7677  | 5.22  |

|   |        |         |       |
|---|--------|---------|-------|
|   | 473.61 | 1.201   | 8.21  |
|   | 479.63 | 1.828   | 12.6  |
|   | 485.57 | 2.716   | 18.8  |
|   | 491.54 | 4.008   | 27.9  |
|   | 443.60 | 0.1167  | 0.773 |
|   | 449.53 | 0.1973  | 1.32  |
|   | 455.51 | 0.3006  | 2.02  |
|   | 461.51 | 0.4524  | 3.05  |
| 7 | 467.54 | 0.7179  | 4.88  |
|   | 473.59 | 1.140   | 7.80  |
|   | 479.62 | 1.767   | 12.2  |
|   | 485.56 | 2.647   | 18.3  |
|   | 491.53 | 3.895   | 27.1  |
|   | 437.68 | 0.06961 | 0.458 |
|   | 449.52 | 0.1762  | 1.17  |
|   | 455.50 | 0.2753  | 1.85  |
|   | 461.50 | 0.4601  | 3.11  |
| 8 | 467.53 | 0.7677  | 5.22  |
|   | 473.58 | 1.183   | 8.10  |
|   | 479.61 | 1.826   | 12.6  |
|   | 485.56 | 2.721   | 18.8  |
|   | 491.53 | 4.026   | 28.1  |

<sup>a</sup> The expanded uncertainties in the vapour pressures are given at 0.95 confidence level, k=2) and calculated according to equation  $U(p_i) = 0.2 p_i$ . Experimental vapour pressures of triglycerides determined with the transpiration technique were used for scaling the mass loss rates of TGA results.

**Table S4.**

Vapour pressures  $p$ , standard ( $p^0 = 0.1$  MPa) molar vaporisation enthalpies,  $\Delta_l^g H_m^0$ , and standard ( $p^0 = 0.1$  MPa) molar vaporisation entropies,  $\Delta_l^g S_m^0$  obtained by the approximation of data collected from SciFinder [10].

| $T/ K$                                                                                                                  | $p_i/\text{Pa}$ | $\Delta_l^g H_m^0(T) / \text{kJ} \cdot \text{mol}^{-1}$ | $\Delta_l^g S_m^0(T) / \text{J} \cdot \text{K}^{-1} \cdot \text{mol}^{-1}$ |
|-------------------------------------------------------------------------------------------------------------------------|-----------------|---------------------------------------------------------|----------------------------------------------------------------------------|
| TG303030: $\Delta_l^g H_m^0(298.15 \text{ K}) = (94.7 \pm 3.9) \text{ kJ} \cdot \text{mol}^{-1}$                        |                 |                                                         |                                                                            |
| $\ln(p_i/p_{ref}) = \frac{389.7}{R} - \frac{125975.7}{RT} - \frac{105}{R} \ln \frac{T}{298.15}; p_{ref} = 1 \text{ Pa}$ |                 |                                                         |                                                                            |
| 403                                                                                                                     | 267             | 83.7                                                    | 158.3                                                                      |
| 405                                                                                                                     | 267             | 83.5                                                    | 156.8                                                                      |
| 449                                                                                                                     | 2666            | 78.8                                                    | 145.4                                                                      |
| 450                                                                                                                     | 2666            | 78.7                                                    | 144.8                                                                      |
| 545                                                                                                                     | 101325          | 68.8                                                    | 126.3                                                                      |
| TG404040: $\Delta_l^g H_m^0(298.15 \text{ K}) = (102.7 \pm 4.3) \text{ kJ} \cdot \text{mol}^{-1}$                       |                 |                                                         |                                                                            |
| $\ln(p_i/p_{ref}) = \frac{412.1}{R} - \frac{137926.4}{RT} - \frac{118}{R} \ln \frac{T}{298.15}; p_{ref} = 1 \text{ Pa}$ |                 |                                                         |                                                                            |
| 394                                                                                                                     | 36              | 91.4                                                    | 166.1                                                                      |
| 398                                                                                                                     | 36              | 91.0                                                    | 162.6                                                                      |
| 401                                                                                                                     | 60              | 90.6                                                    | 164.3                                                                      |
| 403                                                                                                                     | 60              | 90.4                                                    | 162.6                                                                      |
| 463                                                                                                                     | 1999.8          | 83.3                                                    | 147.4                                                                      |
| 578                                                                                                                     | 101325          | 69.7                                                    | 120.7                                                                      |
| 578                                                                                                                     | 101325          | 69.7                                                    | 120.7                                                                      |

|                                                                                                                         |        |      |       |
|-------------------------------------------------------------------------------------------------------------------------|--------|------|-------|
| 580                                                                                                                     | 101325 | 69.4 | 119.7 |
| 583                                                                                                                     | 101325 | 69.1 | 118.7 |
| 583                                                                                                                     | 101325 | 69.1 | 118.7 |
| TG606060: $\Delta_1^g H_m^o(298.15 \text{ K}) = (114.2 \pm 5.6) \text{ kJ} \cdot \text{mol}^{-1}$                       |        |      |       |
| $\ln(p_i/p_{ref}) = \frac{448.6}{R} - \frac{156224.1}{RT} - \frac{141}{R} \ln \frac{T}{298.15}; p_{ref} = 1 \text{ Pa}$ |        |      |       |
| 428                                                                                                                     | 53     | 95.9 | 161.3 |
| 433                                                                                                                     | 67     | 95.2 | 159.0 |
| 515                                                                                                                     | 3733   | 83.6 | 135.0 |
| 517                                                                                                                     | 3733   | 83.3 | 133.8 |
| 633                                                                                                                     | 101325 | 67.0 | 105.9 |

**Table S5**

Compilation of data on molar heat capacities  $C_{p,m}^o(\text{liq})$  and heat capacity differences  $\Delta_1^g C_{p,m}^o$  for the linear aliphatic esters at  $T = 298.15 \text{ K}$  (in  $\text{J} \cdot \text{K}^{-1} \cdot \text{mol}^{-1}$ )

| Ester                 | $C_{p,m}^o(\text{liq})$ [11] | $\Delta_1^g C_{p,m}^o$ <sup>a</sup> |
|-----------------------|------------------------------|-------------------------------------|
| Methyl propanoate     | 172.0                        | -40                                 |
| Methyl butyrate       | 198.1                        | -47                                 |
| Methyl pentanoate     | 229.0                        | -53                                 |
| Methyl hexanoate      | 245.3                        | -70                                 |
| Methyl heptanoate     | 285.0                        | -75                                 |
| Methyl octanoate      | 316.2                        | -77                                 |
| Methyl nonanoate      | 346.1                        | -78                                 |
| Methyl decanoate      | 375.3                        | -85                                 |
| Methyl undecanoate    | 407.1                        | -90                                 |
| Methyl dodecanoate    | 436.9                        | -100                                |
| Methyl tridecanoate   | 467.9                        | -105                                |
| Methyl tetradecanoate | 499.0                        | -112                                |
| Methyl pentadecanoate | 524.7                        | -115                                |
| Methyl hexadecanoate  | 561.9                        | -120                                |
| Methyl heptadecanoate | 592.2                        | -125                                |
| Methyl octadecanoate  | 620.3                        | -130                                |
| Methyl nonadecanoate  | 681.6                        | -135                                |
| Methyl eicosanoate    | 719.7                        | -145                                |

<sup>a</sup> Values recommended for the temperature adjustment of vaporisation enthalpies of aliphatic esters.

**Table S6**

The chain length dependence of the molar heat capacities  $C_{p,m}^o(\text{liq})$  for the linear aliphatic esters at  $T = 298.15 \text{ K}$  (in  $\text{J}\cdot\text{K}^{-1}\cdot\text{mol}^{-1}$ )

| Ester                 | $N_C$ <sup>a</sup> | $C_{p,m}^o(\text{liq})_{\text{exp}}$ [11] | $C_{p,m}^o(\text{liq})_{\text{calc}}$ <sup>b</sup> | $\Delta$ <sup>c</sup> |
|-----------------------|--------------------|-------------------------------------------|----------------------------------------------------|-----------------------|
| Methyl propanoate     | 3                  | 172.0                                     | 159                                                | 13                    |
| Methyl butyrate       | 4                  | 198.1                                     | 191                                                | 7                     |
| Methyl pentanoate     | 5                  | 229.0                                     | 222                                                | 7                     |
| Methyl hexanoate      | 6                  | 245.3                                     | 254                                                | -8                    |
| Methyl heptanoate     | 7                  | 285.0                                     | 285                                                | 0                     |
| Methyl octanoate      | 8                  | 316.2                                     | 317                                                | -1                    |
| Methyl nonanoate      | 9                  | 346.1                                     | 348                                                | -2                    |
| Methyl decanoate      | 10                 | 375.3                                     | 380                                                | -4                    |
| Methyl undecanoate    | 11                 | 407.1                                     | 411                                                | -4                    |
| Methyl dodecanoate    | 12                 | 436.9                                     | 443                                                | -6                    |
| Methyl tridecanoate   | 13                 | 467.9                                     | 474                                                | -6                    |
| Methyl tetradecanoate | 14                 | 499.0                                     | 506                                                | -7                    |
| Methyl pentadecanoate | 15                 | 524.7                                     | 537                                                | -13                   |
| Methyl hexadecanoate  | 16                 | 561.9                                     | 569                                                | -7                    |
| Methyl heptadecanoate | 17                 | 592.2                                     | 600                                                | -8                    |
| Methyl octadecanoate  | 18                 | 620.3                                     | 632                                                | -11                   |
| Methyl nonadecanoate  | 19                 | 681.6                                     | 663                                                | 18                    |
| Methyl eicosanoate    | 20                 | 719.7                                     | 695                                                | 25                    |

<sup>a</sup> Number of C-atoms in the alkyl chain.

<sup>b</sup> Calculated using correlation:

$C_{p,m}^o(\text{liq}) = 31.5 \times N_C + 64.7$  (with  $R^2 = 0.996$ ), derived from data given in this table.

<sup>c</sup> Difference between column 3 and 4.

**Table S7**

Comparison of experimental and additive enthalpies of vaporisation,  $\Delta_l^g H_m^o(298.15 \text{ K})$ , for triglycerides with the linear saturated alkyl chains (in  $\text{kJ mol}^{-1}$ )

|              | $\Delta_l^g H_m^o(298.15 \text{ K})_{\text{exp}}^a$ | $\Delta_l^g H_m^o(298.15 \text{ K})_{\text{calc}}^b$ | $\Delta^c$ |
|--------------|-----------------------------------------------------|------------------------------------------------------|------------|
| TG 303030    | 90.4±0.5                                            | 91.1                                                 | -0.7       |
| TG 404040    | 97.5±0.6                                            | 101.6                                                | -4.1       |
| TG 505050    | 105.0±0.7                                           | 115.9                                                | -10.9      |
| TG 606060    | 114.9±3.6                                           | 130.2                                                | -15.3      |
| TG 707070    | 127.0±2.1                                           | 144.4                                                | -17.4      |
| TG 808080    | 134.1±1.2                                           | 158.7                                                | -24.6      |
| TG 100100100 | 160.1±0.9                                           | 187.3                                                | -27.2      |
| TG 120120120 | 174.9±3.0                                           | 215.8                                                | -40.9      |
| TG 140140140 | 194.2±2.9                                           | 244.4                                                | -50.2      |
| TG 160160160 | 211.0±2.1                                           | 273.0                                                | -62.0      |
| TG 180180180 | 232.1±3.0                                           | 301.5                                                | -69.4      |

<sup>a</sup> Values evaluated and recommended (given in bold) in Table 1 (main text). Uncertainty of the vaporisation enthalpy is expressed as the expanded uncertainty (0.95 level of confidence,  $k = 2$ ).

<sup>b</sup> Calculated using group-additivity (GA) with increments collected in Table 7 (main text).

<sup>c</sup> Difference between column 2 and 3, assigned as dispersion interactions in triglycerides (see Section 3.6).

## References

- [1] Brinkmann, J.; Luebbert, C.; Zaitsau, D. H.; Verevkin, S. P.; Sadowski, G., Thermodynamic Modeling of Triglycerides using PC-SAFT. *J. Chem. Eng. Data* **2019**, *64* (4), 1446-1453.
- [2] Kulikov, D.; Verevkin, S. P.; Heintz, A., Determination of Vapor Pressures and Vaporization Enthalpies of the Aliphatic Branched C5 and C6 Alcohols. *J. Chem. Eng. Data* **2001**, *46* (6), 1593-1600.
- [3] Verevkin, S. P.; Emel'yanenko, V. N., Transpiration method: Vapor pressures and enthalpies of vaporization of some low-boiling esters. *Fluid Phase Equilibr.* **2008**, *266* (1), 64-75.
- [4] Verevkin, S. P.; Sazonova, A. Y.; Emel'yanenko, V. N.; Zaitsau, D. H.; Varfolomeev, M. A.; Solomonov, B. N.; Zherikova, K. V., Thermochemistry of Halogen-Substituted Methylbenzenes. *J. Chem. Eng. Data* **2015**, *60* (1), 89-103.
- [5] Emel'yanenko, V. N.; Verevkin, S. P., Benchmark thermodynamic properties of 1,3-propanediol: Comprehensive experimental and theoretical study. *J. Chem. Thermodyn.* **2015**, *85*, 111-119.
- [6] Verevkin, S. P.; Zaitsau, D. H.; Emel'yanenko, V. N.; Heintz, A., A New Method for the Determination of Vaporization Enthalpies of Ionic Liquids at Low Temperatures. *The Journal of Physical Chemistry B* **2011**, *115* (44), 12889-12895.
- [7] Sauerbrey, G., Verwendung von Schwingquarzen zur Wägung dünner Schichten und zur Mikrowägung. *Z. Physik* **1959**, *155* (2), 206-222.
- [8] Zaitsau, D. H.; Yermalayeu, A. V.; Emel'yanenko, V. N.; Butler, S.; Schubert, T.; Verevkin, S. P., Thermodynamics of Imidazolium-Based Ionic Liquids Containing PF<sub>6</sub> Anions. *J. Phys. Chem. B* **2016**, *120* (32), 7949-7957.
- [9] Verevkin, S. P.; Ralys, R. V.; Zaitsau, D. H.; Emel'yanenko, V. N.; Schick, C., Express thermo-gravimetric method for the vaporization enthalpies appraisal for very low volatile molecular and ionic compounds. *Thermochim. Acta* **2012**, *538*, 55-62.

[10] <https://scifinder.cas.org>.

[11] Zaitsau, D. H.; Pimerzin, A. A.; Verevkin, S. P., Fatty acids methyl esters: Complementary measurements and comprehensive analysis of vaporization thermodynamics. *J. Chem. Thermodyn.* **2019**, *132*, 322-340.
